# Supplementary material for: Advanced solid-state asymmetric supercapacitors based on 3D graphene/MnO2 and graphene/polypyrrole hybrid architectures
Source: Royal Society of Chemistry journal article supplement (doi:10.1039/c5ta02685g), 2015-01-01
Supplement: c5ta02685g1.pdf [file c5ta02685g1.pdf]

## Advanced solid-state asymmetric supercapacitors based on 3D graphene/MnO<sub>2</sub> and graphene/polypyrrole hybrid architectures

Zheye Zhang, Kai Chi, Fei Xiao\* and Shuai Wang\*

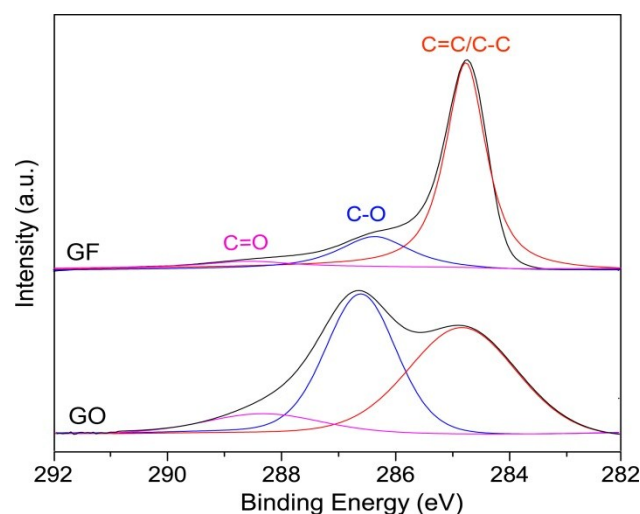

**Fig. S1** The C 1s spectra of GF and GO.

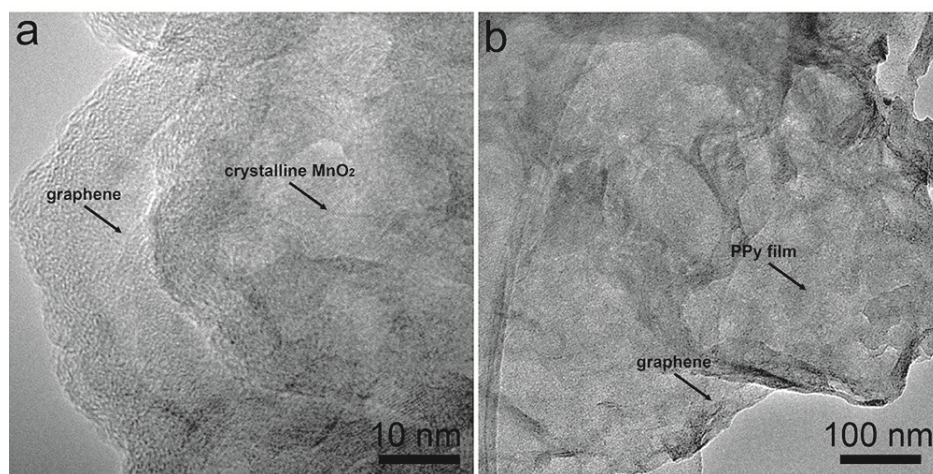

**Fig. S2** TEM images of (a) Ni/GF/MnO<sub>2</sub> and (b) Ni/GF/PPy.

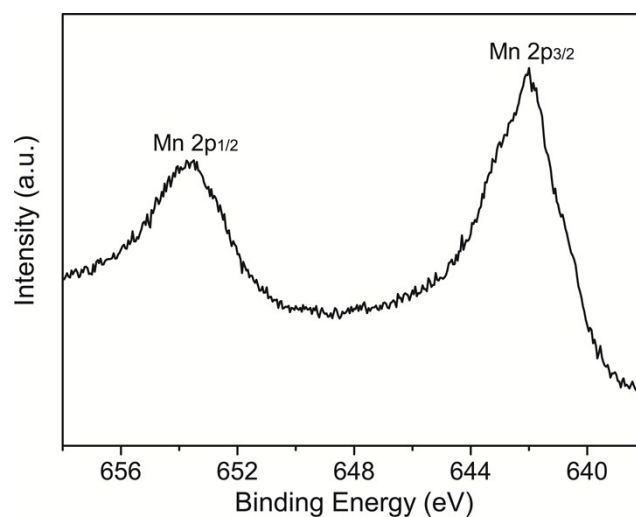

**Fig. S3** Curve fit of Mn 2p spectra of Ni/GF/MnO<sub>2</sub> hybrid architecture.

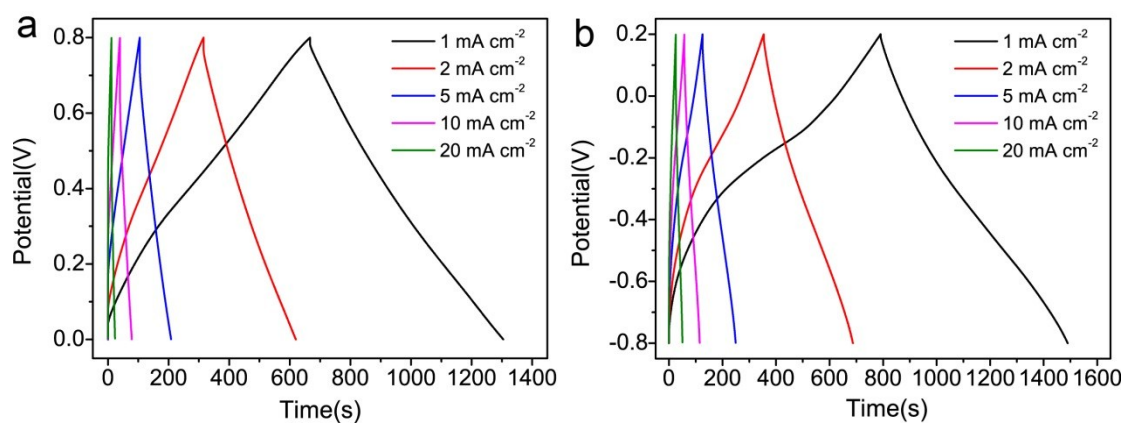

**Fig. S4** Galvanostatic charge/discharge curves of (a) Ni/GF/MnO<sub>2</sub> electrode and (b) Ni/GF/PPy electrode at different current densities.

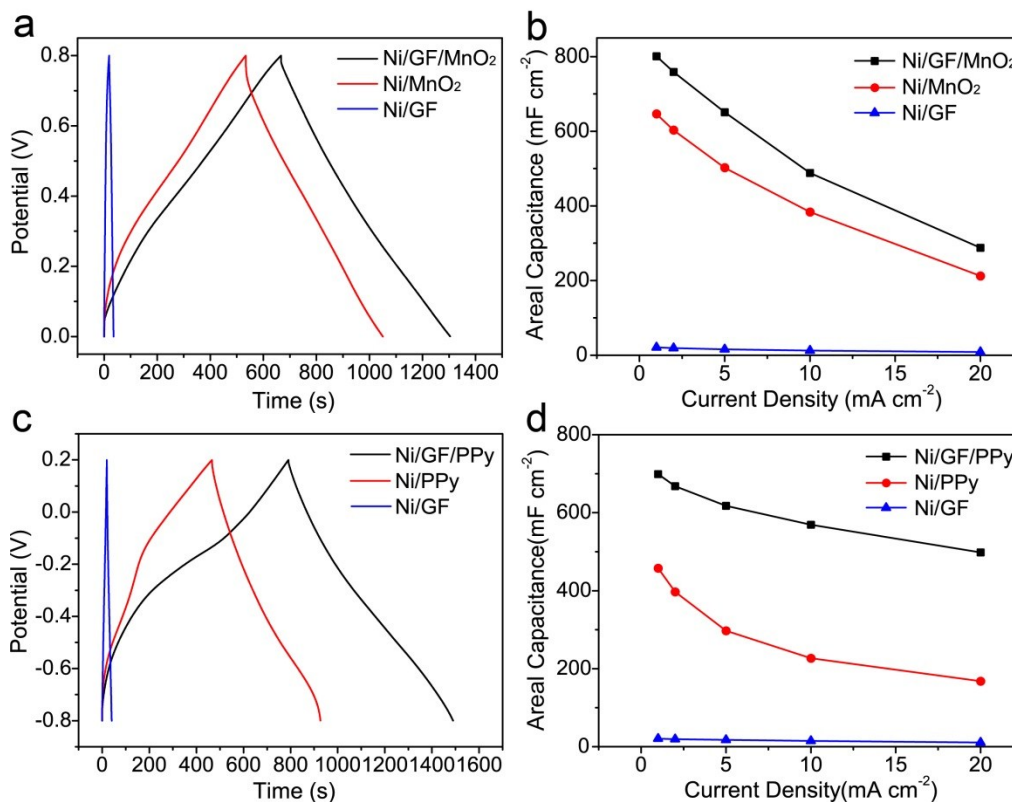

**Fig. S5** Galvanostatic charge/discharge curves of (a) Ni/GF, Ni/MnO<sub>2</sub> and Ni/GF/MnO<sub>2</sub> electrodes and (c) Ni/GF, Ni/PPy and Ni/GF/PPy electrodes at a current density of 1 mA cm<sup>-2</sup>. Dependence of areal capacitance on the charge/discharge current density for (b) Ni/GF, Ni/MnO<sub>2</sub> and Ni/GF/MnO<sub>2</sub> electrodes and (d) Ni/GF, Ni/PPy and Ni/GF/PPy electrodes.

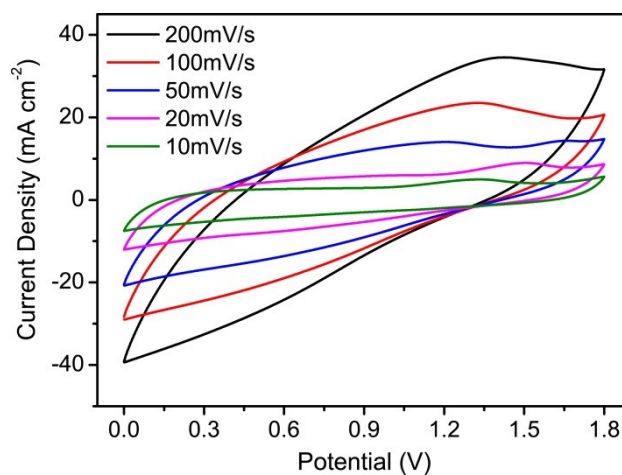

**Fig. S6** CV curves of the asymmetric supercapacitor device collected at different scan rates.

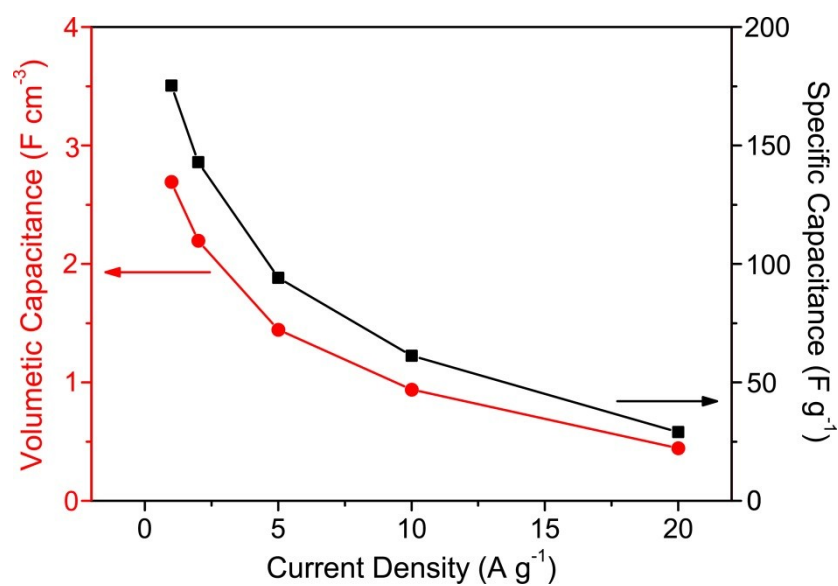

**Fig. S7** Volumetric and specific capacitance calculated from the charge/discharge curves as a function of current density for the asymmetric supercapacitor device.

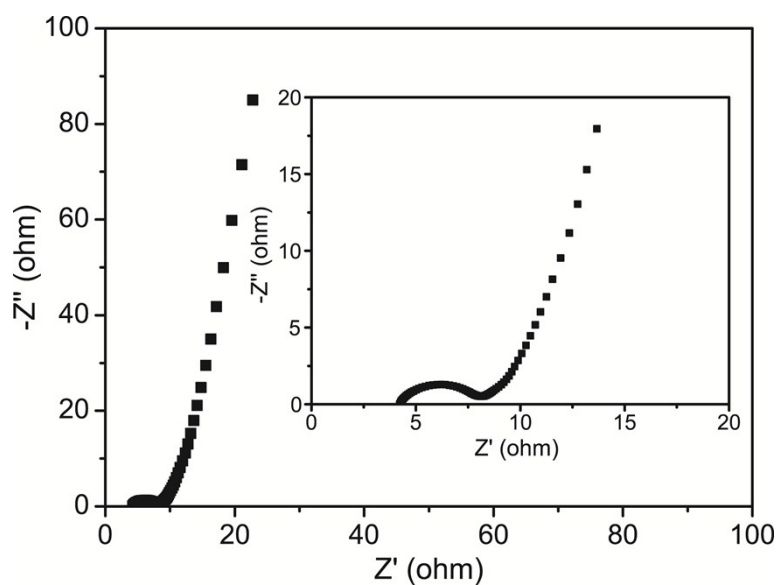

**Fig. S8** Nyquist plots of the asymmetric supercapacitor device. The inset is the enlarged Nyquist plot from the high-frequency region.

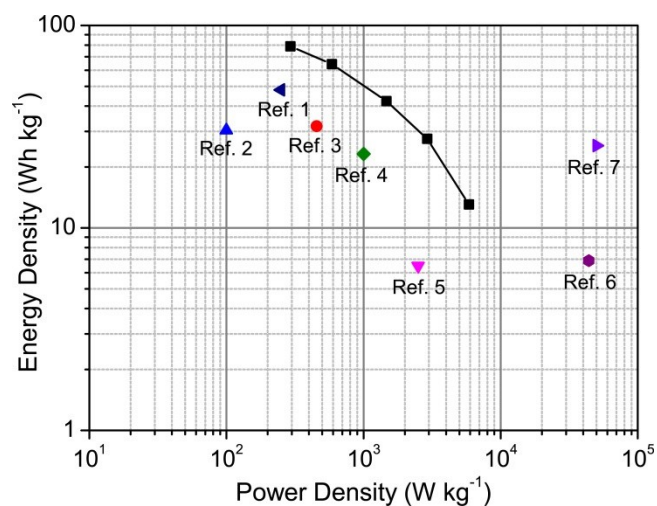

**Fig. S9** Ragone plot of the device and some other devices from previous literature for comparison.

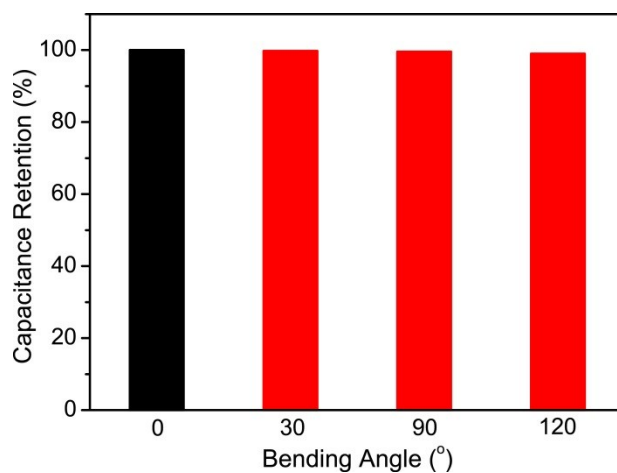

**Fig. S10** Capacitance retention after bending inward to different angles.

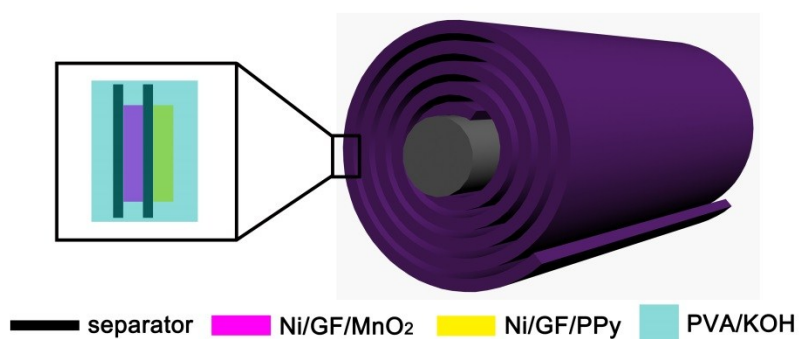

**Fig. S11** Schematic illustration of a winding type solid-state asymmetric supercapacitor.

- [1] H. Wang, Y. Liang, T. Mirfakhrai, Z. Chen, H. S. Casalongue, H. J. Dai, *Nano Res.* 4 (2011) 729.
- [2] Z. S. Wu, W. C. Ren, D. W. Wang, F. Li, B. L. Liu, H. M. Cheng, *ACS Nano* 4 (2010) 5835.
- [3] Z. Y. Zhang, F. Xiao, L. H. Qian, J. W. Xiao, S. Wang, Y. Q. Liu, *Adv. Energ. Mater.* 4 (2014) 10.1002/aenm.201400064.
- [4] H. C. Gao, F. Xiao, C. B. Ching, H. W. Duan, *ACS Appl. Mater. Interfaces* 4 (2012) 2801.
- [5] T. Y. Kim, H. W. Lee, M. Stoller, D. R. Dreyer, C. W. Bielawski, R. S. Ruoff, K. S. Suh, *ACS Nano* 5 (2011) 436.
- [6] J. Y. Ji, L. L. Zhang, H. X. Ji, Y. Li, X. Zhao, X. Bai, X. B. Fan, F. B. Zhang, R. S. Ruoff, *ACS Nano* 7 (2013) 6237.
- [7] P. C. Chen, G. Z. Shen, Y. Shi, H. T. Chen, C. W. Zhou, *ACS Nano* 4 (2010) 4403.
